# Supplementary material
Source: publisher site journal article supplement (https://www.dovepress.com/article/106209)
Supplement: Supplementary file 1 [file get_supplementary_file.php]

## Supplementary Table Turkish Version of M-ISI

Bu anket sizin üriner inkontinansı (istemsiz idrar kaçırma) rahatsızlığınızın seviyesini ölçmek için tasarlanmıştır. Lütfen, son bir ay içinde idrar alışkanlığınıza en uygun olduğunu düşündüğünüz cevabı her soru için işaretleyiniz.

| Son 1 Ay İçerisinde                                                                                                                                        | Asla               | Nadiren                                         | Bazen                                | Yaklaşık Yarı yarıya             | Hemen Her Zaman                   |
|------------------------------------------------------------------------------------------------------------------------------------------------------------|--------------------|-------------------------------------------------|--------------------------------------|----------------------------------|-----------------------------------|
| 1) Ne sıklıkla herhangi bir fiziksel aktivite sırasında (örneğin ağırlık kaldırma, eğilme, oturma, kalkma gibi hareketler) idrar kaçırma şikayetiniz oldu? |                    |                                                 |                                      |                                  |                                   |
| 2) Ne sıklıkla hafif eşyaları kaldırma (örn: beş litrelik dolu su bidonu) sırasında idrar kaçırma şikayetiniz oldu?                                        |                    |                                                 |                                      |                                  |                                   |
| 3) Ne sıklıkla yürüyüş ya da hafif spor/egzersiz yaparken idrar kaçırma şikayetiniz oldu?                                                                  |                    |                                                 |                                      |                                  |                                   |
|                                                                                                                                                            | Asla               | Seyrek                                          | Yaklaşık haftada bir defa            | Yaklaşık günde bir defa          | Günde bir defadan fazla           |
| 4) Ne sıklıkla mesanenizi tam boşaltamadığınız için idrar kaçırdınız?                                                                                      |                    |                                                 |                                      |                                  |                                   |
| 5) Ne sıklıkla ani sıkışma hissiyle beraber idrar kaçırdınız oldu?                                                                                         |                    |                                                 |                                      |                                  |                                   |
| 6) Ne sıklıkla zamanında tuvalete yetişemediğiniz için idrar kaçırdınız oldu?                                                                              |                    |                                                 |                                      |                                  |                                   |
|                                                                                                                                                            | Hiçbirsey          | İnce ped ya da tuvalet kağıdı                   | Orta boy / Normal ped                | En büyük boy ped                 | Tek kullanımlık emici iç çamaşırı |
| 7) Islaklığa karşı korunmak için gün boyunca genellikle ne kullanıyorsunuz?                                                                                |                    |                                                 |                                      |                                  |                                   |
|                                                                                                                                                            | Hiç                | Günde bir veya daha az, veya sadece tedbir için | Günde bir defa ve sıklıkla ıslanıyor | Günde 2-3 defa                   | Günde 4 veya daha fazla           |
| 8) Gün boyunca ıslaklığa karşı korunmak için ped, kağıt mendil ya da tek kullanımlık emici iç çamaşırından genellikle kaç tane kullanıyorsunuz?            |                    |                                                 |                                      |                                  |                                   |
|                                                                                                                                                            |                    |                                                 |                                      | <i>Toplam Şiddet Skoru:</i>      |                                   |
|                                                                                                                                                            | Asla               | Nadiren                                         | Bazen                                | Çoğu zaman                       | Her zaman                         |
| 9) İdrar kaçırdığınızdan dolayı ne sıklıkla günlük işlerinizde değişiklik yapmak zorunda kaldınız?                                                         |                    |                                                 |                                      |                                  |                                   |
|                                                                                                                                                            | Hiç problem olmadı | Çok küçük problem oldu                          | Küçük problem oldu                   | Orta derecede problem oldu       | Büyük ölçüde problem oldu         |
| 10) Geçtiğimiz ay boyunca idrar kaçırdığınız sizin için ne kadar büyük bir sosyal soruna (sinirlilik, utanma, sosyal aktivitelerden kaçınma) sebep oldu?   |                    |                                                 |                                      |                                  |                                   |
|                                                                                                                                                            |                    |                                                 |                                      | <i>Toplam Rahatsızlık Skoru:</i> |                                   |

**Abbreviation:** M-ISI, Michigan Incontinence Severity Index.
